# Supplementary material for: Carbon costs and benefits of France’s biomass energy production targets
Source: Springer Nature journal article supplement (doi:10.1186/s13021-018-0113-5), 2018-12-01

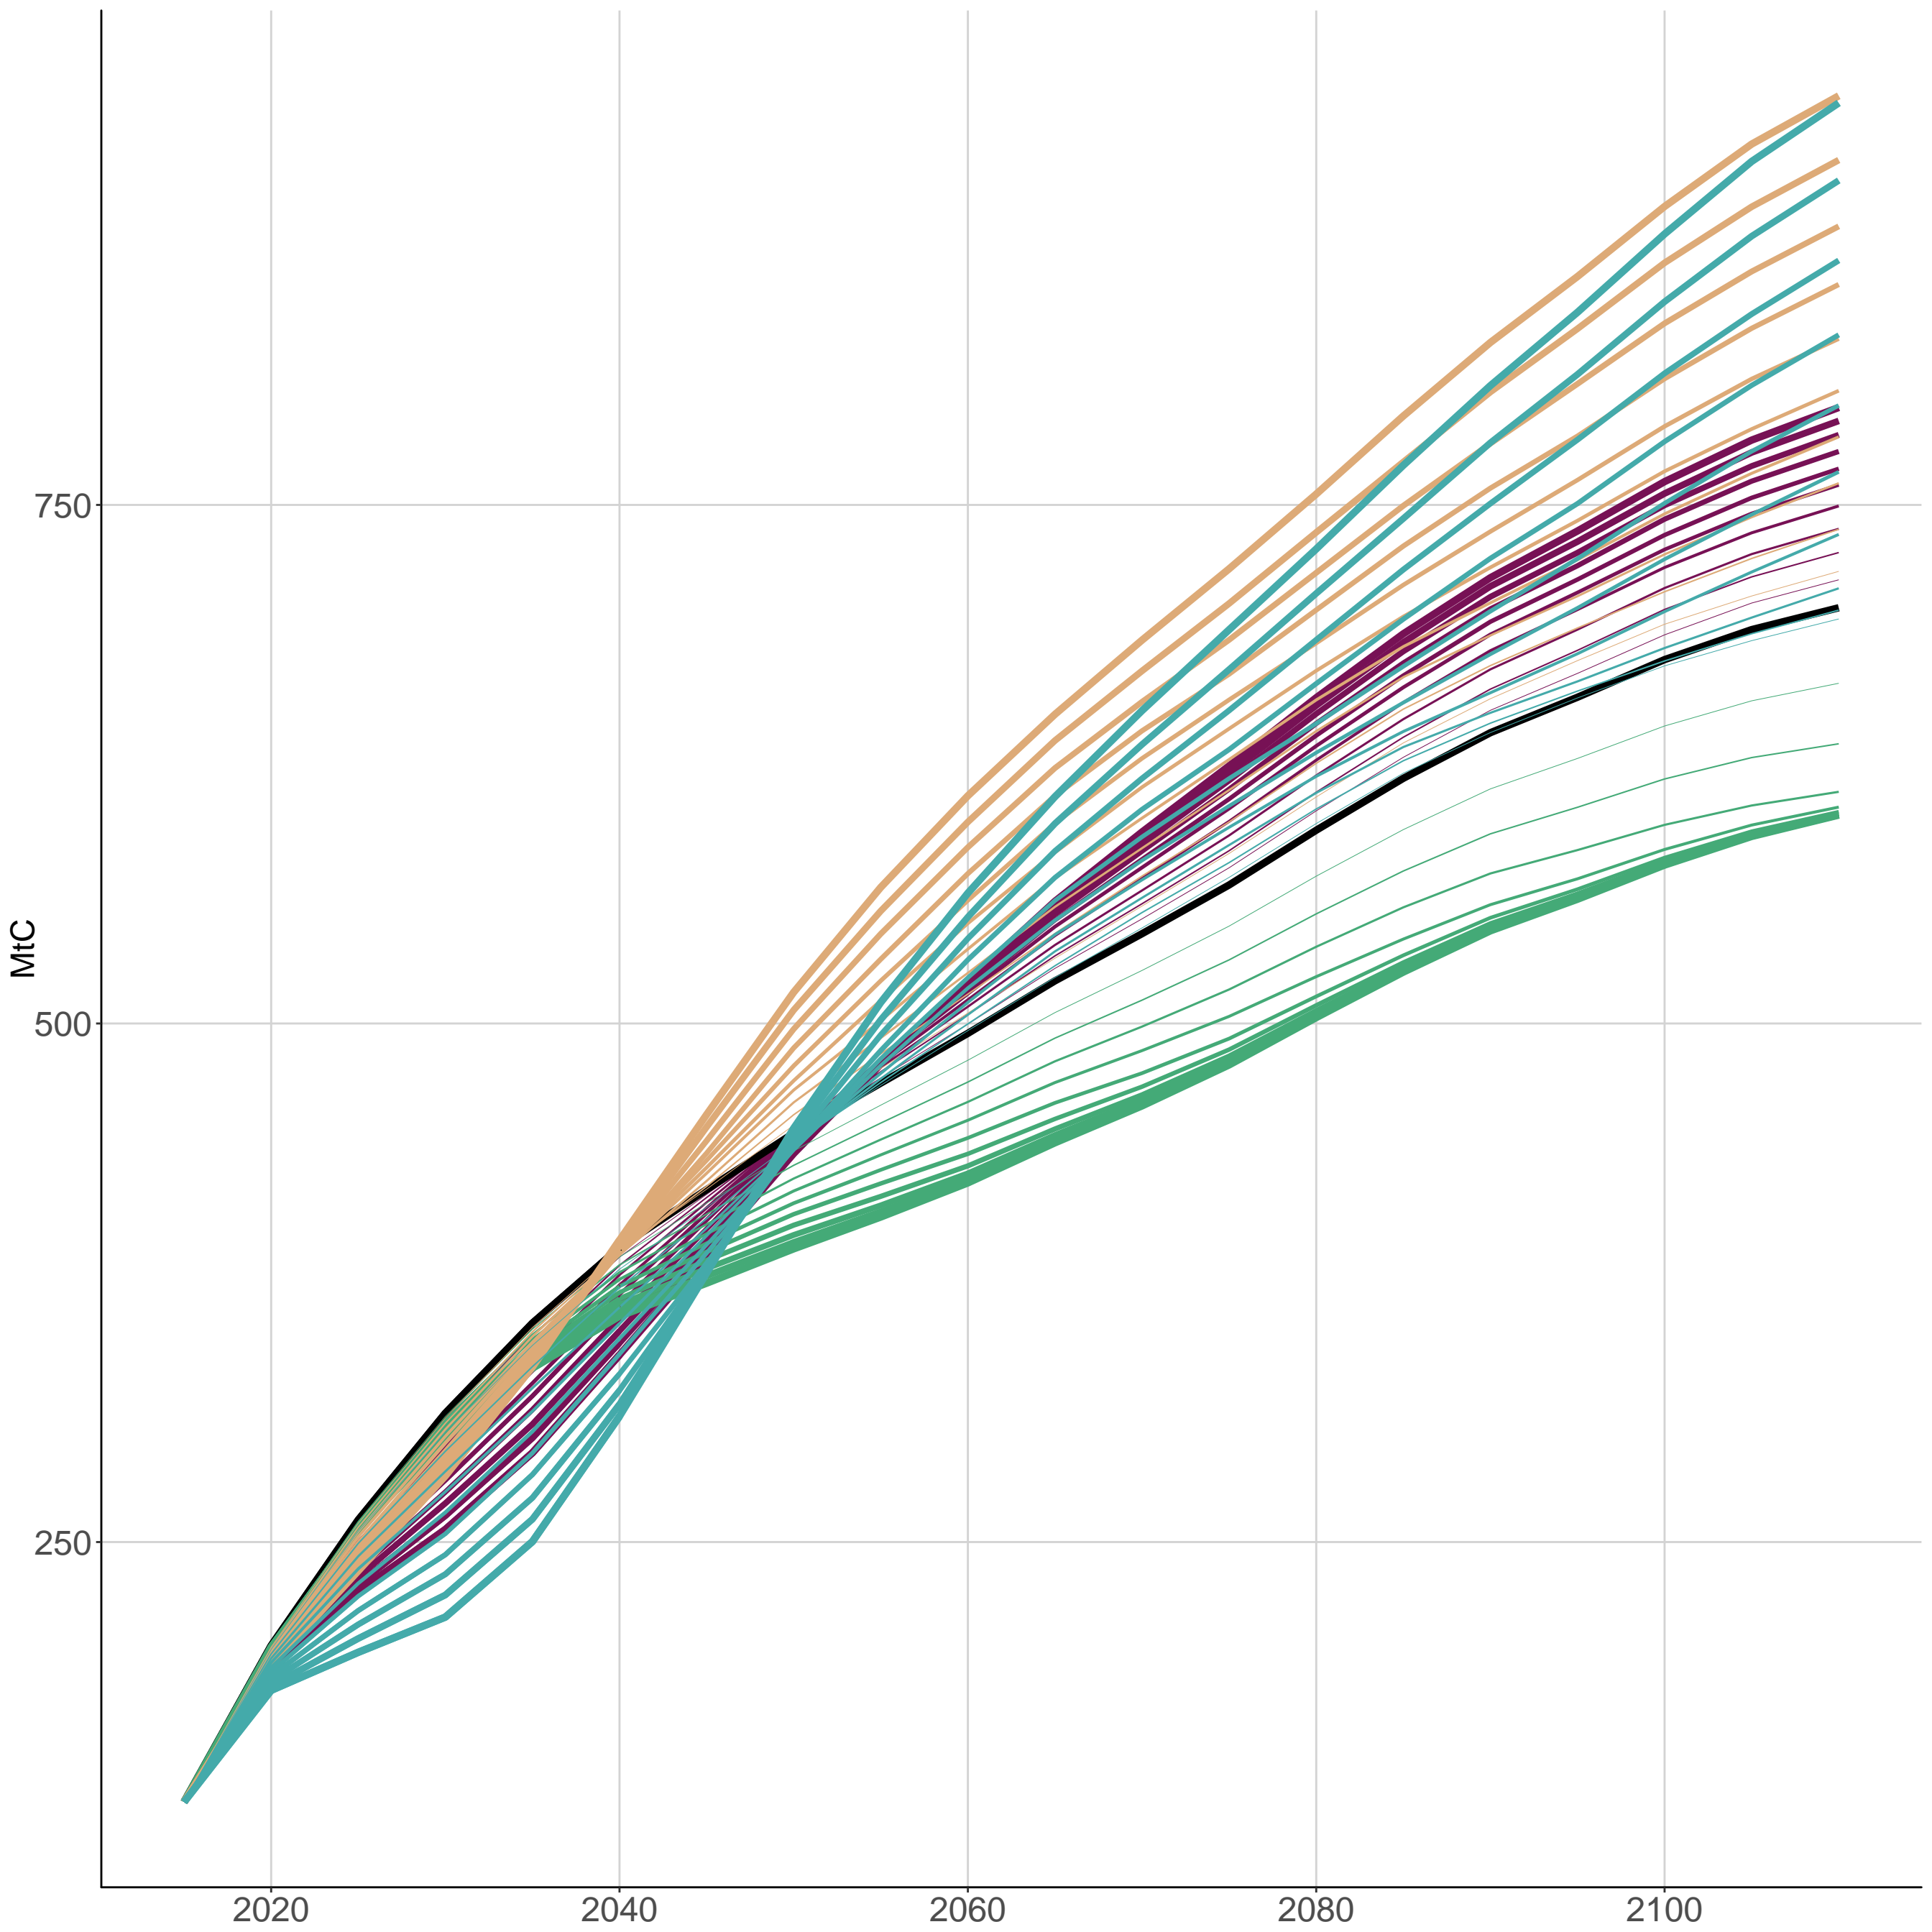

Supplement: 13021_2018_113_MOESM3_ESM.pdf [file 13021_2018_113_MOESM3_ESM.pdf]
