# Supplementary material for: Carbon costs and benefits of France’s biomass energy production targets
Source: PubMed Central journal article supplement (PMC6292836; doi:10.1186/s13021-018-0113-5), 2018-12-13

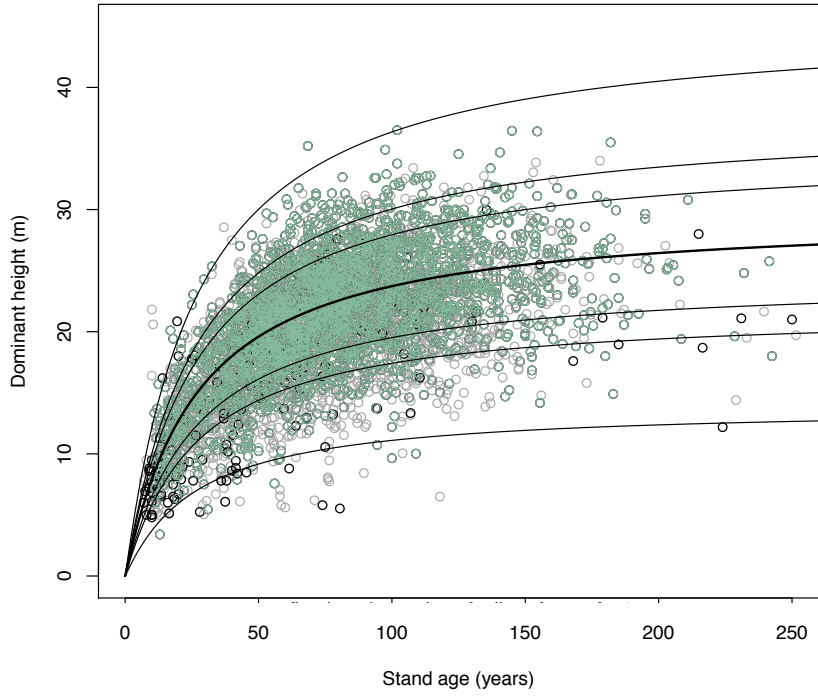

Supplement: 13021_2018_113_MOESM7_ESM.pdf [file 13021_2018_113_MOESM7_ESM.pdf]
