# Supplementary material for: Carbon costs and benefits of France’s biomass energy production targets
Source: Carbon Balance Manag. 2018 Dec 13;13:26. doi: 10.1186/s13021-018-0113-5 (PMC6292836; doi:10.1186/s13021-018-0113-5)
Supplement: Supplementary file 6 — Additional file 6: Table S3. Site and density indices fitted parameters. [file 13021_2018_113_MOESM6_ESM.xlsx]

## Sheet: Feuil1
Species	Stand structure	Site index guide curve parameters			Density index self-thinning line parameters
		a	b	d	g	h
quercus robur	high stand	29.44	26.3326	1.04133	12.9828	-1.96714
	coppice with standards	26.0625	22.9477	1.14196
quercus petraea	high stand	38.5106	50.2266	0.799564	13.2962	-2.06966
	coppice with standards	28.6476	29.5676	0.934429
quercus pubescens	high stand	16.7888	17.1179	1.77779	11.5159	-1.45638
	coppice with standards	17.1125	14.6184	0.803314
	coppice	9.31217	9.77981	4.18516
quercus ilex	high stand	21.0758	70.9291	1.16349	9.1985	-0.461301
fagus sylvatica	high stand	28.2299	22.2292	1.50162	13.9451	-2.1993
castanea sativa	coppice with standards	17.7593	11.2997	2.11317	12.2764	-1.62578
	coppice	16.0496	8.39548	2.12243
carpinus betulus	high stand	24.4762	21.2239	1.41928	13.7255	-2.19993
	coppice with standards	20.7169	16.5705	1.40846
fraxinus excelsior	high stand	32.0506	22.1321	1.08614	12.4937	-1.80106
	coppice with standards	25.4133	15.664	1.19652
other deciduous	high stand	20.5938	11.12	1.43835	11.0244	-1.25672
	coppice with standards	16.9774	5.97237	1.0875
pinus pinaster	high stand	26.3596	14.9426	1.2807	12.1024	-1.68246
pinus sylvestris	high stand	19.5105	14.6356	1.38252	12.4856	-1.74998
pinus laricio	high stand	30.0716	23.7928	1.14208	11.5207	-1.44393
pinus nigra	high stand	24.504	28.4934	1.23283	12.4583	-1.74369
pinus halepensis	high stand	15.3684	17.6148	1.65059	12.4509	-1.83244
	coppice with standards	16.2314	19.419	2.07226
abies alba	high stand	28.7837	21.9963	1.85143	12.9874	-1.85288
picea abies	high stand	30.464	19.9496	1.79361	13.2256	-1.9095
pseudotsuga menziesii	high stand	42.211	23.7274	1.54521	11.4114	-1.42149
other conifers	high stand	20.6756	14.026	3.15312	11.6751	-1.48256
