# Supplementary material for: Carbon costs and benefits of France’s biomass energy production targets
Source: Carbon Balance Manag. 2018 Dec 13;13:26. doi: 10.1186/s13021-018-0113-5 (PMC6292836; doi:10.1186/s13021-018-0113-5)
Supplement: Supplementary file 9 — Additional file 9: Table S1. Exploitability indices adapted from IGN methodology [49 Colours indicate the level of exploitability from easy (green), medium (yellow), difficult (orange) to impossible (brown). [file 13021_2018_113_MOESM9_ESM.xlsx]

## Sheet: Feuil1
		accessible terrain			rough terrain			not accessible terrain
		slope
Skidding road	Distance to skidding road	0-15 %	15-30 %	>30 %	0-15 %	15-30 %	>30 %	0-15 %	15-30 %	>30 %
-	0-200m
Existing	200-500m
	500-1000m
	1000-2000m
	>2000m
To be created
Impossible
