# Supplementary material for: Carbon costs and benefits of France’s biomass energy production targets
Source: Carbon Balance Manag. 2018 Dec 13;13:26. doi: 10.1186/s13021-018-0113-5 (PMC6292836; doi:10.1186/s13021-018-0113-5)
Supplement: Supplementary file 10 — Additional file 10: Table S2. Current practice parameters for harvest and thinning. [file 13021_2018_113_MOESM10_ESM.xlsx]

## Sheet: Feuil1
	Clear-cut diameter (cm)					Density threshold (-)	Five-years thinning ratio (-)
	High stand				Coppice
Species	fertility class 4 (most fertile)	fertility class 3	fertility class 2	fertility class 1 (least fertile)
quercus robur	48	60	55	66	20	0.78	0.05
quercus petraea	44	60	64	68	30	1.02	0.08
quercus pubescens	20	25	27	35	20	0.78	0.05
quercus ilex	18	20	18	20	30	0.96	0.05
fagus sylvatica	40	48	60	65	20	0.7	0.09
castanea sativa	45	40	50	40	20	1.08	0.15
carpinus betulus	28	30	40	33	20	0.84	0.12
fraxinus excelsior	24	48	33	48	20	0.66	0.1
other deciduous	20	28	30	32	20	0.78	0.1
pinus pinaster	40	45	50	53	NA	0.84	0.13
pinus sylvestris	28	40	44	44	NA	0.66	0.11
pinus laricio	30	36	33	NA	NA	0.99	0.12
pinus nigra	30	48	28	NA	NA	0.9	0.03
pinus halepensis	35	40	30	45	NA	0.9	0.1
abies alba	35	44	44	59	NA	0.96	0.08
picea abies	35	40	40	48	NA	1.2	0.11
pseudotsuga menziesii	40	48	45	45	NA	0.78	0.09
other conifers	22	30	26	43	NA	0.78	0.11
